# Supplementary material for: Resolving the Technosphere
Source: Copernicus journal article supplement (doi:10.5194/egusphere-2024-1133), 2024-05-08
Supplement: Supplementary file 1 [file egusphere-2024-1133-supplement.pdf]

| Technosphere categories      |                                   | Data sources |         |        |             | Estimates         |           |          | Uncertainty<br>Range |
|------------------------------|-----------------------------------|--------------|---------|--------|-------------|-------------------|-----------|----------|----------------------|
|                              |                                   | MISO2        | Matitia | Other  | Other ref   | non-<br>buildings | buildings | Combined |                      |
|                              | Residential buildings             | 289813       | 246072  | 512000 | Haberl      | 0                 | 349295    | 349295   | 1.5                  |
|                              | Service buildings                 |              |         | 15000  | Deetman     | 0                 | 15000     | 15000    | 3                    |
| Ambient                      | Ambient conditioning              | 285          |         |        |             | 285               | 0         | 285      | 5                    |
|                              | Furnishings                       | 1415         | 436     |        |             | 1445              | 0         | 1445     | 3                    |
|                              | Apparel                           | 37           | 389     |        |             | 389               | 0         | 389      | 5                    |
| Informational                | Storage & Processing              | 1585         | 47      |        |             | 1585              | 660       | 2245     | 5                    |
|                              | Communications Infrastructure     | 24570        |         |        |             | 24570             | 1270      | 25840    | 5                    |
|                              | Food growth & collection          | 84           | 625     |        |             | 625               | 1270      | 1895     | 5                    |
| Food provision               | Food processing                   | 42           |         |        |             | 42                | 2540      | 2582     | 5                    |
|                              | Food preparation                  | 76           | 236     |        |             | 156               | 0         | 156      |                      |
|                              | Extraction                        | 713          |         |        |             | 713               | 6350      | 7063     | 5                    |
| Non-food provision           | Water supply                      | 58194        |         |        |             | 58194             | 1270      | 59464    | 5                    |
|                              | Energy provision                  | 55996        | 12016   | 10399  | Kalt        | 26137             | 1270      | 27407    | 4                    |
| Technosphere                 | Processing                        | 420          |         |        |             | 420               | 29210     | 29630    | 3                    |
| construction and maintenance | Artifact creation and maintenance | 1888         | 3867    |        |             | 2877              | 44450     | 47327    | 3                    |
|                              | Construction                      | 839          | 1960    |        |             | 1400              | 6350      | 7750     | 3                    |
| Maintenance of surroundings  | Inhabited environment maintenance | 378          | 473     |        |             | 425               | 0         | 425      | 5                    |
|                              | Waste management                  | 48495        |         |        |             | 48495             | 6350      | 54845    | 3                    |
|                              | Surfaces                          | 337090.5     | 376908  | 314000 | Wiedenhofer | 342666            | 0         | 342666   | 1.5                  |
|                              | Vehicles                          | 4773         | 4398    |        |             | 4398              | 0         | 4398     | 1.5                  |
| Transportation               | Aircraft                          |              | 2       |        |             | 2                 | 0         | 2        | 3                    |
|                              | Aquatic vessels                   |              | 626     |        |             | 626               | 0         | 626      | 2                    |
|                              | Packaging & logistics             | 24719        | 948     |        |             | 24719             | 25140     | 49859    | 3                    |
|                              | Pipelines                         | 4850         | 1075    |        |             | 2962              | 0         | 2962     | 3                    |
|                              | Force                             |              | 21      |        |             | 64                | 4470      | 4534     | 4                    |
| Allocation                   | Access control                    |              |         |        |             |                   | 12950     | 12950    | 3                    |
|                              | Allocation activities             | 4            |         |        |             | 4                 | 1980      | 1984     | 3                    |
| Somatic                      | Health care, hygiene & grooming   | 78           | 73      |        |             | 76                | 2920      | 2996     | 3                    |
|                              | Deliberate neural restructuring   | 4            |         |        |             | 4                 | 6600      | 6604     | 3                    |
| Neural                       | Active recreation                 | 2425         |         |        |             | 2425              | 3300      | 5725     | 3                    |
|                              | Interactive                       | 78           |         |        |             | 78                | 1650      | 1728     | 3                    |

Supplementary Table. Masses of EUTEC categories as estimated from previously-published works. All masses given as Mt. The range obtained by multiplying or dividing the combined estimate by the uncertainty range factor is expected to span the true value 95% of the time.
